# Supplementary material for: The Xbp1-regulated transcription factor Mist1 restricts antibody secretion by restraining Blimp1 expression in plasma cells
Source: Front Immunol. 2022 Dec 21;13:859598. doi: 10.3389/fimmu.2022.859598 (PMC9811352; doi:10.3389/fimmu.2022.859598)
Supplement: Supplementary file 1 [file Table_1.xlsx]

## Sheet: Xbp1-activated genes
Supplementary Table 1: Xbp1-activated genes determined by RNA-seq of Cd23-Cre Xbp1(fl/fl) [Xbp1(∆/∆)] versus control Xbp1(fl/fl) plasmablasts
Gene	Gene description	Functional annotation	Mean TPM	Mean TPM	Fold activation	Log2-fold act.	Adjusted P value	TPM 58378	TPM 58379	TPM 58380	TPM 58381	SEM (TPM)	SEM (TPM	Xbp1 binding
			Xbp1(fl/fl)	Xbp1(∆/∆)	(fl/fl) / (∆/∆)	(fl/fl) / (∆/∆)		Xbp1(fl/fl)	Xbp1(fl/fl)	Xbp1(∆/∆)	Xbp1(∆/∆)	Xbp1(fl/fl)	Xbp1(∆/∆)	Xbp1(Bio/Bio)
Ufl1	UFM1 specific ligase 1	Antigen presentation	84.08	24.47	-3.96453	-1.98715	4.2e-77	80.82	87.35	25.24	23.71	3.26481	0.762934	Xbp1 bound
Rnf130	ring finger protein 130	Antigen presentation	28.23	10.13	-3.21446	-1.68458	2.26e-16	27.32	29.13	10.5	9.76	0.908728	0.368972	no Xbp1 binding
Dnajb11	DnaJ heat shock protein family (Hsp40) member B11	ER function	947.13	137.39	-7.97113	-2.99478	6.46e-238	967.18	927.08	138.49	136.29	20.0478	1.0984	Xbp1 bound
Rab3d	RAB3D, member RAS oncogene family	ER function	25.82	4.41	-6.75749	-2.75649	1.92e-56	26.23	25.41	4.74	4.07	0.409128	0.336753	no Xbp1 binding
Mzb1	marginal zone B and B1 cell specific protein	ER function	15284	3626.97	-4.87233	-2.28461	4.25e-126	15573.4	14994.6	3706.61	3547.32	289.429	79.6439	Xbp1 bound
Lman1	lectin, mannose binding 1	ER function	659.6	171.22	-4.45485	-2.15538	1.13e-143	671.41	647.8	167.01	175.43	11.8081	4.20708	Xbp1 bound
Ssr3	signal sequence receptor subunit 3	ER function	1418.96	404.32	-4.05584	-2.02	2.35e-112	1421.01	1416.9	408.75	399.89	2.05215	4.43074	Xbp1 bound
Stt3a	STT3A, catalytic subunit of the oligosaccharyltransferase complex	ER function	1203.25	361.92	-3.84522	-1.94306	5.76e-113	1241.33	1165.17	365.93	357.92	38.0809	4.00542	Xbp1 bound
Ostc	oligosaccharyltransferase complex non-catalytic subunit	ER function	1155.91	373.14	-3.57962	-1.83981	5.07e-94	1158.36	1153.46	379.16	367.12	2.45026	6.01746	Xbp1 bound
Selk	selenoprotein K	ER function	469.63	165.68	-3.27509	-1.71154	1.23e-55	464.29	474.96	163.23	168.12	5.33527	2.44766	Xbp1 bound
Prdx4	peroxiredoxin 4	ER function	1179.45	427.97	-3.18319	-1.67047	3.14e-57	1158.39	1200.52	431.47	424.47	21.0658	3.49849	Xbp1 bound
Calu	calumenin	ER function	493.99	183.85	-3.10534	-1.63475	3.94e-87	497.31	490.67	186.95	180.75	3.31838	3.10009	Xbp1 bound
Prkcsh	protein kinase C substrate 80K-H	ER function	562.49	211.29	-3.07783	-1.62191	1.5e-62	577.47	547.51	219.14	203.44	14.9815	7.84746	Xbp1 bound
Spcs3	signal peptidase complex subunit 3	ER function	1082.86	411.09	-3.04491	-1.6064	3.04e-87	1097.2	1068.51	421.71	400.48	14.343	10.6147	Xbp1 bound
Hspa13	heat shock protein family A (Hsp70) member 13	ER stress	260.42	31.07	-9.69435	-3.27714	1.68e-261	270.65	250.19	31.67	30.46	10.2313	0.600458	Xbp1 bound
Uba5	ubiquitin like modifier activating enzyme 5	ER stress	242.19	48.85	-5.73429	-2.51962	4.6e-114	247.13	237.26	47.58	50.11	4.93553	1.26636	Xbp1 bound
Tmem214	transmembrane protein 214	ER stress	376.37	90.28	-4.81902	-2.26874	2.16e-127	379.07	373.66	89.12	91.44	2.70497	1.15641	Xbp1 bound
Tmem208	transmembrane protein 208	ER stress	169.13	41.8	-4.67667	-2.22548	1.16e-51	172.93	165.34	41.87	41.72	3.79751	0.0744132	Xbp1 bound
Vimp	selenoprotein S	ER stress	676.83	183.17	-4.27179	-2.09484	1.33e-87	676.31	677.36	174.42	191.91	0.524443	8.74626	Xbp1 bound
Slc35b1	solute carrier family 35 member B1	ER stress	710.07	218.77	-3.75447	-1.90861	4.07e-83	736.51	683.64	216.88	220.66	26.4346	1.88945	Xbp1 bound
LOC100504608	EEF1A lysine methyltransferase 3	Metabolism	19.12	0.71	-29.9961	-4.9067	7.11e-15	18.5	19.74	1.24	0.18	0.619915	0.533139	Xbp1 bound
Ckb	creatine kinase B	Metabolism	21.07	1.71	-14.2307	-3.83094	3.08e-31	23.79	18.35	1.84	1.58	2.72011	0.127629	Xbp1 bound
Art4	ADP-ribosyltransferase 4 (Dombrock blood group)	Metabolism	25.14	2.07	-13.8971	-3.79671	1.1e-51	24.92	25.36	2.64	1.5	0.223976	0.572442	Xbp1 bound
Ak7	adenylate kinase 7	Metabolism	5.06	0.49	-11.6998	-3.54841	1.53e-18	4.66	5.47	0.7	0.28	0.404851	0.211774	Xbp1 bound
Isg20	interferon stimulated exonuclease gene 20	Metabolism	340.24	35.22	-11.1638	-3.48075	5.94e-157	343.3	337.17	35.34	35.1	3.06674	0.122031	Xbp1 bound
Entpd7	ectonucleoside triphosphate diphosphohydrolase 7	Metabolism	22.76	3	-8.79817	-3.1372	1.29e-106	22.91	22.61	2.78	3.21	0.151024	0.215177	Xbp1 bound
Gm2a	GM2 ganglioside activator	Metabolism	162.84	27.4	-6.87078	-2.78047	1.06e-157	169.48	156.2	28.79	26	6.63764	1.39549	no Xbp1 binding
Rpn2	ribophorin II	Metabolism	1652.19	289.22	-6.60709	-2.72401	5.01e-170	1709.69	1594.7	299.67	278.77	57.4941	10.4492	Xbp1 bound
Gmppb	GDP-mannose pyrophosphorylase B	Metabolism	161.99	30.63	-6.10828	-2.61077	2.11e-110	165.72	158.27	31.85	29.42	3.72221	1.21773	Xbp1 bound
Mogs	mannosyl-oligosaccharide glucosidase	Metabolism	170.09	33.69	-5.82789	-2.54297	2.6e-139	171.99	168.19	36.05	31.34	1.90354	2.35514	Xbp1 bound
Qpctl	glutaminyl-peptide cyclotransferase like	Metabolism	141.92	28.56	-5.74464	-2.52222	9.48e-113	144.38	139.46	28.43	28.69	2.46064	0.131594	Xbp1 bound
Impdh1	inosine monophosphate dehydrogenase 1	Metabolism	180.62	36.88	-5.65583	-2.49974	1.9e-139	179.28	181.96	37.91	35.84	1.34106	1.03093	Xbp1 bound
Pecr	peroxisomal trans-2-enoyl-CoA reductase	Metabolism	74.67	16.86	-5.11521	-2.35479	2.39e-45	76.84	72.49	17.13	16.6	2.17313	0.263112	Xbp1 bound
Ide	insulin degrading enzyme	Metabolism	211.83	55.59	-4.40157	-2.13802	8.59e-08	202.72	220.93	43.69	67.5	9.10596	11.9051	no Xbp1 binding
Lipg	lipase G, endothelial type	Metabolism	24.28	6.38	-4.38739	-2.13336	1.02e-44	23.69	24.87	6.88	5.88	0.590851	0.500914	Xbp1 bound
Gmppa	GDP-mannose pyrophosphorylase A	Metabolism	375.58	108.81	-3.98631	-1.99505	4.33e-113	364.68	386.47	107.47	110.16	10.8946	1.34461	Xbp1 bound
Mlec	malectin	Metabolism	401.49	123.28	-3.76669	-1.9133	1.61e-118	413.64	389.34	122.7	123.86	12.1472	0.579122	Xbp1 bound
Chpf2	chondroitin polymerizing factor 2	Metabolism	106.12	32.78	-3.74227	-1.90392	3.54e-87	107.05	105.19	32.44	33.11	0.926023	0.335421	Xbp1 bound
Dnpep	aspartyl aminopeptidase	Metabolism	151.32	47.3	-3.6955	-1.88577	2.28e-58	152.83	149.82	49.42	45.18	1.5063	2.11991	Xbp1 bound
Ccbl2	kynurenine aminotransferase 3	Metabolism	17.39	5.5	-3.6341	-1.8616	7.6e-17	17.21	17.57	6.62	4.38	0.181427	1.12045	Xbp1 bound
Pgm3	phosphoglucomutase 3	Metabolism	27.96	9.08	-3.55055	-1.82804	1.05e-45	27.9	28.02	9.71	8.45	0.0599993	0.629549	Xbp1 bound
Fdps	farnesyl diphosphate synthase	Metabolism	137.47	44.85	-3.53449	-1.8215	2.85e-47	133.77	141.16	48.88	40.82	3.69544	4.03281	Xbp1 bound
Srm	spermidine synthase	Metabolism	248.59	82.95	-3.4631	-1.79206	1.5e-60	254.68	242.49	85.9	79.99	6.09978	2.95142	Xbp1 bound
Gnptg	N-acetylglucosamine-1-phosphate transferase subunit gamma	Metabolism	57.58	19.4	-3.43287	-1.77942	1.1e-26	57.41	57.75	18.47	20.33	0.168869	0.9279	Xbp1 bound
Hgsnat	heparan-alpha-glucosaminide N-acetyltransferase	Metabolism	41.66	14.5	-3.31344	-1.72833	4.09e-37	42.33	40.98	15.52	13.49	0.678288	1.01171	Xbp1 bound
Gale	UDP-galactose-4-epimerase	Metabolism	77.42	27.61	-3.24309	-1.69737	4.85e-37	76.16	78.68	25.7	29.52	1.26444	1.90726	Xbp1 bound
Nans	N-acetylneuraminate synthase	Metabolism	337.09	126.3	-3.08373	-1.62468	7.68e-62	337.38	336.81	129.06	123.53	0.284513	2.7611	Xbp1 bound
B3gnt9	UDP-GlcNAc:betaGal beta-1,3-N-acetylglucosaminyltransferase 9	Metabolism	32.44	12.3	-3.05212	-1.60981	5.69e-24	33.46	31.43	11.65	12.95	1.0174	0.651449	Xbp1 bound
Acsl3	acyl-CoA synthetase long chain family member 3	Metabolism	40.25	15.26	-3.04236	-1.60519	1.28e-34	40.34	40.15	17.06	13.45	0.0929877	1.80818	Xbp1 bound
B3galt4	beta-1,3-galactosyltransferase 4	Metabolism	31.08	11.86	-3.041	-1.60454	1.89e-14	32.71	29.44	9.91	13.8	1.63511	1.94472	Xbp1 bound
Rnf185	ring finger protein 185	Metabolism	70.92	27.1	-3.02361	-1.59627	1.59e-45	71.41	70.43	27.14	27.06	0.490955	0.041208	Xbp1 bound
Oat	ornithine aminotransferase	Metabolism	316.23	121.22	-3.0161	-1.59268	5.84e-60	319.96	312.5	118	124.44	3.72922	3.21645	Xbp1 bound
Gmds	GDP-mannose 4,6-dehydratase	Metabolism	87.03	33.34	-3.01258	-1.591	3.64e-36	86.97	87.08	35	31.67	0.0553519	1.66485	Xbp1 bound
Nucb1	nucleobindin 1	Other	1265.83	146.24	-10.0033	-3.32241	7.32e-302	1279.28	1252.38	151.23	141.26	13.4501	4.98104	Xbp1 bound
Kcnab2	potassium voltage-gated channel subfamily A regulatory beta subunit 2	Other	157.78	20.97	-8.69823	-3.12072	2.36e-218	158.81	156.75	20.52	21.42	1.03103	0.452601	Xbp1 bound
Serpini1	serpin family I member 1	Other	23.82	4.08	-6.73396	-2.75145	4.52e-44	24.25	23.4	4.5	3.65	0.424841	0.426896	Xbp1 bound
Atat1	alpha tubulin acetyltransferase 1	Other	25.06	4.37	-6.64496	-2.73226	1.47e-44	23.12	27	3.75	4.99	1.94381	0.619824	Xbp1 bound
Nucb2	nucleobindin 2	Other	56.42	10.53	-6.19444	-2.63097	2.98e-61	55.66	57.18	10.28	10.77	0.759144	0.246133	Xbp1 bound
Crisp3	cysteine-rich secretory protein 1	Other	59.29	14.7	-4.65541	-2.21891	1.4e-36	57.69	60.9	14.87	14.54	1.60599	0.164877	no Xbp1 binding
Cyb561	cytochrome b561	Other	6.51	1.75	-4.30007	-2.10436	1.01e-11	6.37	6.64	1.75	1.74	0.136932	0.00768937	no Xbp1 binding
Sidt2	SID1 transmembrane family member 2	Other	163.31	43.98	-4.2939	-2.10229	2.03e-108	167.31	159.32	43.2	44.77	3.9961	0.786531	Xbp1 bound
Nbas	neuroblastoma amplified sequence	Other	67.94	19.91	-3.94903	-1.9815	3.15e-85	71.48	64.4	19.49	20.33	3.5406	0.419834	Xbp1 bound
Cyb561d2	cytochrome b561 family member D2	Other	33.83	10.31	-3.79573	-1.92438	2.98e-26	35	32.65	9.99	10.63	1.17143	0.318467	Xbp1 bound
Trmt61b	tRNA methyltransferase 61B	Other	7.17	2.2	-3.75094	-1.90725	4.38e-11	7.41	6.93	2.32	2.09	0.241852	0.117158	Xbp1 bound
Chid1	chitinase domain containing 1	Other	106.29	33.24	-3.69771	-1.88663	3.1e-70	107.97	104.61	32.15	34.33	1.67978	1.08741	Xbp1 bound
Mgat2	mannosyl (alpha-1,6-)-glycoprotein beta-1,2-N-acetylglucosaminyltransferase	Other	364.53	115.17	-3.65888	-1.8714	5.15e-98	369.95	359.11	115.01	115.34	5.42124	0.165809	Xbp1 bound
Nup210	nucleoporin 210	Other	105.05	34.24	-3.54881	-1.82734	5.89e-89	108.04	102.05	33.59	34.88	2.99516	0.649141	no Xbp1 binding
H2-T24	histocompatibility 2, T region locus 24	Other	50.04	17	-3.40245	-1.76657	3.13e-34	50.8	49.27	16.86	17.13	0.768703	0.133898	Xbp1 bound
Igf2r	insulin like growth factor 2 receptor	Other	102.61	34.93	-3.39672	-1.76414	2.64e-94	104.93	100.29	35.04	34.81	2.31999	0.116551	Xbp1 bound
Armcx3	armadillo repeat containing X-linked 3	Other	7.83	2.68	-3.385	-1.75916	4.7e-12	8.04	7.62	2.24	3.12	0.208766	0.439662	Xbp1 bound
Dkkl1	dickkopf like acrosomal protein 1	Other	8.92	3.04	-3.37412	-1.75451	0.000281	7.61	10.23	3.49	2.59	1.31163	0.449286	no Xbp1 binding
Csn3	casein kappa	Other	13.57	4.65	-3.35848	-1.74781	2.49e-10	13.33	13.82	5.37	3.93	0.248579	0.721249	no Xbp1 binding
Surf4	surfeit 4	Other	860.16	298.73	-3.33159	-1.73621	3.32e-67	898.37	821.95	298.31	299.16	38.2071	0.424086	Xbp1 bound
Hdlbp	high density lipoprotein binding protein	Other	602.1	211.12	-3.29792	-1.72156	7.14e-90	614.55	589.64	208.75	213.48	12.4576	2.36458	Xbp1 bound
Hook1	hook microtubule tethering protein 1	Other	83.56	29.46	-3.27877	-1.71315	1.04e-69	82.71	84.4	28.11	30.8	0.844582	1.3452	Xbp1 bound
Slc38a10	solute carrier family 38 member 10	Other	218.8	77.54	-3.26131	-1.70545	1.38e-96	219.35	218.26	77.28	77.8	0.547109	0.26048	Xbp1 bound
Btd	biotinidase	Other	121.18	43.53	-3.21785	-1.6861	2.18e-52	124.43	117.94	43.82	43.24	3.24584	0.286967	Xbp1 bound
5031425E22Rik	RIKEN cDNA 5031425E22 gene	Other	161.22	58.47	-3.19519	-1.6759	1.01e-12	172.73	149.71	48.9	68.04	11.5107	9.57407	Xbp1 bound
Usp44	ubiquitin specific peptidase 44	Other	7	2.6	-3.09924	-1.63192	1.93e-09	7.42	6.58	3.24	1.96	0.420587	0.639513	Xbp1 bound
Gorasp2	golgi reassembly stacking protein 2	Other	398.63	149.62	-3.07958	-1.62273	9.11e-57	401.43	395.82	148.91	150.33	2.80509	0.708701	Xbp1 bound
Elmod2	ELMO domain containing 2	Other	30.31	11.64	-3.01024	-1.58988	1.15e-36	30.15	30.47	11.04	12.25	0.161814	0.602748	Xbp1 bound
Hid1	HID1 domain containing	Protein trafficking	123.81	2.66	-53.2972	-5.73599	3.55e-299	120.26	127.35	3.12	2.2	3.54843	0.457598	Xbp1 bound
Fcrla	Fc receptor like A	Protein trafficking	91.04	7.4	-14.2547	-3.83337	5.49e-141	94.76	87.33	7.1	7.69	3.71842	0.293708	Xbp1 bound
Sec61b	Sec61 translocon beta subunit	Protein trafficking	820.06	179.72	-5.27175	-2.39828	1.28e-101	841.36	798.77	189.94	169.51	21.2981	10.2153	Xbp1 bound
Bet1	Bet1 golgi vesicular membrane trafficking protein	Protein trafficking	210.68	47.18	-5.15652	-2.3664	9.38e-92	212.33	209.02	49.16	45.21	1.65721	1.97668	Xbp1 bound
Ift20	intraflagellar transport 20	Protein trafficking	508.88	137.86	-4.27103	-2.09458	1.68e-68	526.19	491.58	132.22	143.5	17.3038	5.63921	Xbp1 bound
Yif1b	Yip1 interacting factor homolog B, membrane trafficking protein	Protein trafficking	240.49	84.97	-3.26973	-1.70917	7.98e-56	243.96	237.02	87.19	82.76	3.47032	2.21587	Xbp1 bound
Slpi	secretory leukocyte peptidase inhibitor	Protein turnover	13506.4	2963.12	-5.26868	-2.39744	1.18e-106	13418.5	13594.2	2663.2	3263.03	87.8279	299.915	no Xbp1 binding
Os9	OS9, endoplasmic reticulum lectin	Protein turnover	778.62	218.74	-4.11722	-2.04167	7.81e-115	802.55	754.68	217.69	219.79	23.9348	1.0522	Xbp1 bound
Sdf2l1	stromal cell derived factor 2 like 1	Protein turnover	1902.3	534.57	-4.11305	-2.04021	5.94e-106	1929.99	1874.6	558.35	510.79	27.697	23.7803	Xbp1 bound
Ddx25	DEAD-box helicase 25	RNA processing	7.02	1.78	-4.53295	-2.18045	1.47e-08	6.51	7.52	1.88	1.69	0.503672	0.0954024	Xbp1 bound
Tapbp	TAP binding protein	RNA processing	597.31	154.37	-4.47666	-2.16242	4.09e-115	623.96	570.66	155.38	153.36	26.6512	1.0134	Xbp1 bound
Utp14b	UTP14C, small subunit processome component	RNA processing	5.58	1.76	-3.64656	-1.86654	2.91e-11	4.8	6.36	1.8	1.73	0.777254	0.034909	Xbp1 bound
Mcts2	malignant T cell amplified sequence 2	RNA processing	32.11	12.28	-3.02873	-1.59871	7.64e-10	31.17	33.05	10.65	13.92	0.937794	1.63525	no Xbp1 binding
Itgb2	integrin subunit beta 2	Signaling	325.82	19.77	-19.065	-4.25286	0	338.58	313.07	19.57	19.98	12.7547	0.204239	Xbp1 bound
Ppapdc1b	phospholipid phosphatase 5	Signaling	304.95	26.59	-13.2507	-3.728	3.5e-215	310.94	298.97	27.28	25.89	5.98441	0.693798	Xbp1 bound
Insig1	insulin induced gene 1	Signaling	220.05	36.15	-7.02536	-2.81257	3.71e-154	221.53	218.57	39.47	32.83	1.47805	3.32166	Xbp1 bound
Cysltr2	cysteinyl leukotriene receptor 2	Signaling	41.25	7.91	-6.03755	-2.59396	7.58e-43	45.22	37.29	7.77	8.05	3.96877	0.140797	no Xbp1 binding
Sh2d2a	SH2 domain containing 2A	Signaling	5.27	1.45	-4.17899	-2.06315	1.9e-14	5.15	5.4	1.71	1.19	0.121962	0.261065	Xbp1 bound
Il2rg	interleukin 2 receptor subunit gamma	Signaling	868.68	250.02	-4.02105	-2.00757	8e-84	915.97	821.39	249.25	250.79	47.2896	0.766974	no Xbp1 binding
Gnat2	G protein subunit alpha transducin 2	Signaling	7.43	2.28	-3.76588	-1.91299	1.53e-08	7.28	7.57	2.14	2.42	0.142734	0.142149	no Xbp1 binding
Adcy7	adenylate cyclase 7	Signaling	40.53	12.84	-3.64958	-1.86773	9.6e-70	39.07	42	12	13.67	1.46676	0.836051	Xbp1 bound
Rasd1	ras related dexamethasone induced 1	Signaling	47.8	15.58	-3.55563	-1.83011	3.04e-19	55.07	40.54	15.33	15.84	7.26424	0.25321	Xbp1 bound
Ebi3	Epstein-Barr virus induced 3	Signaling	223.78	77.78	-3.32201	-1.73206	1.29e-44	225.22	222.33	82.49	73.08	1.44439	4.70578	no Xbp1 binding
Myzap	myocardial zonula adherens protein	Signaling	31.35	11.82	-3.05889	-1.61301	6.75e-25	29.44	33.27	12.12	11.53	1.91255	0.298839	Xbp1 bound
Pag1	phosphoprotein membrane anchor with glycosphingolipid microdomains 1	Signaling	8.76	3.36	-3.0117	-1.59058	1.01e-20	9.38	8.13	3.47	3.25	0.629017	0.11205	Xbp1 bound
Cd68	CD68 molecule	Surface receptor	129.55	17.78	-8.42841	-3.07526	8.19e-109	128.28	130.81	16.9	18.66	1.26366	0.878874	Xbp1 bound
Kctd12	potassium channel tetramerization domain containing 12	Surface receptor	12.62	1.82	-8.0318	-3.00572	5.93e-54	13.34	11.9	1.83	1.81	0.719076	0.0105463	Xbp1 bound
Cd180	CD180 molecule	Surface receptor	37.6	9.62	-4.50422	-2.17128	5.52e-36	39.67	35.54	11.15	8.09	2.06406	1.53226	Xbp1 bound
Lrp8	LDL receptor related protein 8	Surface receptor	8.65	3.21	-3.1142	-1.63886	2.22e-24	7.95	9.35	3.07	3.35	0.698807	0.139708	Xbp1 bound
Tmem66	store-operated calcium entry associated regulatory factor	Surface receptor	430.56	160.67	-3.09865	-1.63164	7.81e-58	442.74	418.37	162.2	159.15	12.1851	1.52817	Xbp1 bound
Bhlha15	basic helix-loop-helix family member a15	Transcription regulator	167.47	3.09	-62.6314	-5.96881	1.03e-64	175.79	159.16	3.57	2.6	8.31658	0.484118	Xbp1 bound
Nfxl1	nuclear transcription factor, X-box binding like 1	Transcription regulator	82.6	11.59	-8.24317	-3.0432	3.61e-173	81.81	83.4	11.18	11.99	0.79376	0.407484	Xbp1 bound
Preb	prolactin regulatory element binding	Transcription regulator	129.89	40.99	-3.66177	-1.87254	2.24e-95	128.95	130.83	40.38	41.6	0.937324	0.608891	Xbp1 bound
Kcnk6	potassium two pore domain channel subfamily K member 6	Transporter	43.66	1.48	-34.0538	-5.08974	2.32e-176	43.68	43.63	1.43	1.53	0.024429	0.0500992	Xbp1 bound
Myo1h	myosin IH	Transporter	5.53	0.73	-8.72001	-3.12433	1.51e-20	4.57	6.5	0.84	0.61	0.968168	0.116535	Xbp1 bound
Rab39b	RAB39B, member RAS oncogene family	Transporter	22.42	4.24	-6.09213	-2.60695	2.31e-55	21.7	23.14	4.4	4.08	0.719001	0.15934	Xbp1 bound
Cacna1s	calcium voltage-gated channel subunit alpha1 S	Transporter	32.38	6.43	-5.79932	-2.53588	3.35e-81	31.82	32.93	7.28	5.58	0.551647	0.851924	Xbp1 bound
Slc1a5	solute carrier family 1 member 5	Transporter	395.66	81.46	-5.61484	-2.48925	9.76e-149	391.19	400.13	76.38	86.53	4.4673	5.07348	Xbp1 bound
Slc17a9	solute carrier family 17 member 9	Transporter	53.65	11.45	-5.40841	-2.4352	2.24e-67	48.99	58.32	11.31	11.58	4.6687	0.135809	Xbp1 bound
Sec61g	Sec61 translocon gamma subunit	Transporter	12.09	2.63	-5.35811	-2.42172	1.91e-07	14.01	10.17	1.95	3.31	1.9203	0.68198	Xbp1 bound
Slc2a6	solute carrier family 2 member 6	Transporter	31.6	6.82	-5.3434	-2.41776	6e-42	29.83	33.36	6.91	6.73	1.76865	0.0878432	Xbp1 bound
Magt1	magnesium transporter 1	Transporter	343.32	79.85	-4.9736	-2.31429	2.92e-147	353.55	333.09	77.12	82.59	10.2309	2.73045	Xbp1 bound
Slc30a5	solute carrier family 30 member 5	Transporter	211.97	53.73	-4.56061	-2.18923	3.59e-134	214.18	209.76	53.19	54.26	2.21	0.535618	Xbp1 bound
Slc39a7	solute carrier family 39 member 7	Transporter	506.7	152.87	-3.83139	-1.93787	4.69e-100	507.32	506.08	147.9	157.84	0.618109	4.96842	Xbp1 bound
Slc30a7	solute carrier family 30 member 7	Transporter	40.24	12.4	-3.75057	-1.90711	1.96e-90	39.63	40.85	11.97	12.83	0.608032	0.427185	Xbp1 bound
Ldlr	low density lipoprotein receptor	Transporter	34.73	11.34	-3.53552	-1.82192	1.29e-43	34.8	34.67	12.04	10.63	0.0615471	0.705445	Xbp1 bound
Kctd14	potassium channel tetramerization domain containing 14	Transporter	6.05	2.1	-3.32641	-1.73397	3.86e-08	5.95	6.15	1.99	2.21	0.0970776	0.108465	Xbp1 bound
Slc31a1	solute carrier family 31 member 1	Transporter	106.78	40.3	-3.0588	-1.61297	3.43e-61	104.55	109.02	41.98	38.62	2.23533	1.67816	Xbp1 bound
Slc39a11	solute carrier family 39 member 11	Transporter	134.54	51.4	-3.02705	-1.59791	2.61e-51	135.97	133.1	48.77	54.03	1.43432	2.6337	Xbp1 bound
D10Bwg1379e	ARFGEF family member 3	unknown	12.3	0.76	-19.0053	-4.24833	3.04e-87	13.05	11.55	0.54	0.97	0.749483	0.215556	Xbp1 bound
Mir7678	microRNA 7678	unknown	33.23	3.16	-11.93	-3.57653	0.00336	36.05	30.42	4.59	1.73	2.81424	1.42713	no Xbp1 binding
Papln	papilin, proteoglycan like sulfated glycoprotein	unknown	51.27	8.42	-7.05245	-2.81813	2.82e-120	51.17	51.36	7.57	9.27	0.0975803	0.853865	no Xbp1 binding
Evi2a	ecotropic viral integration site 2A	unknown	196.83	32.62	-6.97363	-2.80191	2.47e-125	196.24	197.42	32.14	33.09	0.591971	0.474984	Xbp1 bound
Mir7094-2	microRNA 7094-2	unknown	49.44	8.5	-6.64253	-2.73173	0.00268	44.9	53.99	10.85	6.15	4.54569	2.35293	no Xbp1 binding
Tmem255a	transmembrane protein 255A	unknown	9.88	2.02	-5.68113	-2.50618	1.94e-24	10.45	9.31	1.71	2.33	0.571202	0.310922	no Xbp1 binding
Egfl7	EGF like domain multiple 7	unknown	5.21	1.09	-5.48158	-2.45459	1.57e-07	4.8	5.61	1.2	0.98	0.401584	0.109238	no Xbp1 binding
2610524H06Rik	RIKEN cDNA 2610524H06 gene	unknown	67.18	15.68	-4.95655	-2.30934	3.81e-39	64.28	70.08	14.7	16.65	2.89942	0.976456	Xbp1 bound
H2-T23	major histocompatibility complex, class I, E	unknown	555.63	130.3	-4.93106	-2.3019	3.32e-93	571.31	539.95	130.37	130.24	15.6807	0.0694801	no Xbp1 binding
Ttc13	tetratricopeptide repeat domain 13	unknown	97.7	23.5	-4.80511	-2.26457	2.39e-87	99.22	96.17	23.53	23.47	1.5253	0.0300132	Xbp1 bound
BC004004	chromosome 6 open reading frame 89	unknown	173.74	43.33	-4.63293	-2.21192	1.52e-105	174.93	172.56	44.24	42.41	1.18554	0.913347	Xbp1 bound
Tes	testin LIM domain protein	unknown	86.77	23.73	-4.21813	-2.0766	1.4e-68	85.49	88.04	25.11	22.36	1.27387	1.37821	Xbp1 bound
Tmem39a	transmembrane protein 39A	unknown	112.7	31.73	-4.10557	-2.03758	5.39e-95	114.17	111.23	31.44	32.02	1.47394	0.286521	Xbp1 bound
2810408I11Rik	RIKEN cDNA 2810408I11 gene	unknown	31.13	9.27	-3.8646	-1.95032	4.83e-11	35.33	26.92	10.96	7.59	4.20174	1.68625	Xbp1 bound
Zfp324	zinc finger protein 324	unknown	22.98	6.91	-3.84043	-1.94127	9.16e-43	23.49	22.46	7.14	6.68	0.514148	0.228356	Xbp1 bound
Trabd	TraB domain containing	unknown	314.55	97.07	-3.74516	-1.90503	5.05e-98	317.09	312.01	97.16	96.98	2.54079	0.0908039	Xbp1 bound
Mir22hg	Mir22 host gene (non-protein coding)	unknown	26.18	8.76	-3.44954	-1.7864	3.19e-14	25.93	26.43	9.1	8.42	0.247666	0.335752	Xbp1 bound
Tmem248	transmembrane protein 248	unknown	205.67	68.97	-3.4482	-1.78584	2.3e-77	211.52	199.83	69.38	68.56	5.84604	0.411953	Xbp1 bound
2610035D17Rik	RIKEN cDNA 2610035D17 gene	unknown	16.58	5.57	-3.44813	-1.78581	2.89e-13	15.89	17.27	4.76	6.39	0.69004	0.814977	Xbp1 bound
Scfd2	sec1 family domain containing 2	unknown	24.4	8.2	-3.43913	-1.78204	1.13e-36	24.19	24.62	8	8.4	0.215997	0.196177	Xbp1 bound
Gm9199	glycine cleavage system protein H (aminomethyl carrier) pseudogene	unknown	17.41	6.01	-3.34272	-1.74102	1.13e-09	18.61	16.21	6.57	5.44	1.20331	0.565767	Xbp1 bound
Gpr108	G protein-coupled receptor 108	unknown	125.4	43.73	-3.31227	-1.72782	1.84e-52	123.95	126.85	43.95	43.51	1.44982	0.221955	Xbp1 bound
Timd2	T cell immunoglobulin and mucin domain containing 2	unknown	135.72	47.64	-3.29902	-1.72204	0.0111	138.28	133.17	25.05	70.23	2.5557	22.592	no Xbp1 binding
Prrc1	proline rich coiled-coil 1	unknown	98.04	35.58	-3.18487	-1.67123	9.42e-68	99.63	96.46	36.17	34.98	1.58205	0.593865	Xbp1 bound
Yipf2	Yip1 domain family member 2	unknown	68.23	24.84	-3.1779	-1.66807	1.37e-41	68.12	68.34	23.18	26.49	0.108471	1.65277	Xbp1 bound
Plcxd2	phosphatidylinositol specific phospholipase C X domain containing 2	unknown	12.31	4.49	-3.17512	-1.66681	1.82e-20	11.55	13.08	3.86	5.11	0.767243	0.625122	Xbp1 bound
Ccdc134	coiled-coil domain containing 134	unknown	111.95	40.91	-3.16096	-1.66036	4.63e-48	104.4	119.51	38.05	43.77	7.55545	2.85823	Xbp1 bound
Cdr2	cerebellar degeneration related protein 2	unknown	27.21	10.38	-3.03173	-1.60014	7.92e-24	28.38	26.04	10.19	10.57	1.17037	0.189702	Xbp1 bound
Gm20257	caspase 8 pseudogene	unknown	6.1	2.31	-3.02634	-1.59757	0.00434	4.89	7.31	2.78	1.84	1.20677	0.471956	Xbp1 bound
Tbl2	transducin beta like 2	unknown	66.26	25.38	-3.01286	-1.59113	9.27e-51	65.89	66.63	27.31	23.45	0.37091	1.92916	Xbp1 bound
Fkbp11	FK506 binding protein 11	UPR	445.63	11.96	-42.7343	-5.41732	2.6e-258	424.22	467.03	13.57	10.36	21.4071	1.60472	Xbp1 bound
Rpn1	ribophorin I	UPR	1456.55	93.33	-18.0394	-4.17308	0	1485.02	1428.07	97.9	88.75	28.4743	4.57088	Xbp1 bound
Sec24d	SEC24 homolog D, COPII coat complex component	UPR	312.16	24.75	-14.5693	-3.86486	0	318.07	306.24	25.97	23.53	5.91507	1.22356	Xbp1 bound
Erp44	endoplasmic reticulum protein 44	UPR	626.01	56.49	-12.8078	-3.67895	4.54e-268	638.16	613.85	58.22	54.76	12.1575	1.72992	Xbp1 bound
Dnajb9	DnaJ heat shock protein family (Hsp40) member B9	UPR	306.02	29.68	-11.9449	-3.57832	3.16e-254	307.81	304.22	26.65	32.7	1.79596	3.02297	Xbp1 bound
Dnajc3	DnaJ heat shock protein family (Hsp40) member C3	UPR	506.21	55.33	-10.5781	-3.403	8.11e-279	520.41	492	57.24	53.42	14.2037	1.90765	Xbp1 bound
Hyou1	hypoxia up-regulated 1	UPR	1187.8	133.73	-10.2679	-3.36008	0	1205.7	1169.89	135.77	131.69	17.9034	2.03751	Xbp1 bound
Edem2	ER degradation enhancing alpha-mannosidase like protein 2	UPR	826.39	136.58	-6.99627	-2.80659	4.59e-214	843.52	809.25	136.64	136.51	17.1371	0.0627565	Xbp1 bound
Ddost	dolichyl-diphosphooligosaccharide--protein glycosyltransferase non-catalytic subunit	UPR	1843.16	313.13	-6.80752	-2.76713	1.47e-182	1899.76	1786.55	319.91	306.36	56.6032	6.77549	Xbp1 bound
Atf6b	activating transcription factor 6 beta	UPR	229.62	48.83	-5.43104	-2.44123	2.15e-146	231.07	228.17	51.22	46.43	1.44967	2.39566	Xbp1 bound
Ero1lb	endoplasmic reticulum oxidoreductase 1 beta	UPR	226.61	52.83	-4.95455	-2.30875	2.31e-138	228.18	225.04	56.43	49.22	1.56969	3.60463	Xbp1 bound
Sec61a1	Sec61 translocon alpha 1 subunit	UPR	927.52	217.37	-4.93618	-2.30339	2.2e-155	963.13	891.92	218.57	216.17	35.6044	1.2005	Xbp1 bound
Serp1	stress associated endoplasmic reticulum protein 1	UPR	2979.4	787.89	-4.37072	-2.12787	3.11e-118	2986.69	2972.11	779.07	796.71	7.28838	8.82067	Xbp1 bound
Uggt1	UDP-glucose glycoprotein glucosyltransferase 1	UPR	158.72	42.06	-4.36316	-2.12537	3.16e-146	161.98	155.46	41.64	42.49	3.26215	0.423523	Xbp1 bound
Creld2	cysteine rich with EGF like domains 2	UPR	1632.55	432.67	-4.36279	-2.12525	6.2e-121	1668.79	1596.3	437.8	427.54	36.2423	5.12969	Xbp1 bound
Arfgap3	ADP ribosylation factor GTPase activating protein 3	UPR	148.81	43.09	-3.99117	-1.99681	1.94e-91	152.34	145.27	43.82	42.36	3.53418	0.729172	Xbp1 bound
Srprb	SRP receptor subunit beta	UPR	284.73	83.18	-3.9564	-1.98419	9.03e-92	289.75	279.71	85.42	80.94	5.01977	2.23956	Xbp1 bound
Ssr4	signal sequence receptor subunit 4	UPR	1907.06	567.5	-3.88187	-1.95675	2.3e-94	1883.73	1930.39	575.75	559.25	23.3284	8.24806	Xbp1 bound
Sec23b	Sec23 homolog B, coat complex II component	UPR	315.83	95.1	-3.84092	-1.94145	3.29e-100	323.87	307.79	92.93	97.27	8.04282	2.16572	Xbp1 bound
Dhdds	dehydrodolichyl diphosphate synthase subunit	UPR	189.61	58.9	-3.7227	-1.89635	6.57e-78	194.81	184.4	58.8	58.99	5.20391	0.090727	Xbp1 bound
P4hb	prolyl 4-hydroxylase subunit beta	UPR	1863.18	609.39	-3.53241	-1.82065	3.83e-94	1861.54	1864.81	649.46	569.32	1.63332	40.0667	Xbp1 bound
Ficd	FIC domain containing	UPR	22.66	7.52	-3.48828	-1.80252	4.64e-25	24.29	21.03	7.11	7.93	1.63065	0.41374	Xbp1 bound
Ssr2	signal sequence receptor subunit 2	UPR	1995.4	666.52	-3.46096	-1.79117	2.65e-84	2026.93	1963.86	676.81	656.24	31.5327	10.2865	Xbp1 bound
Pdia6	protein disulfide isomerase family A member 6	UPR	3021.02	1036.58	-3.3697	-1.75262	2.61e-87	3086.41	2955.63	1075.65	997.51	65.3871	39.0679	Xbp1 bound
Sec63	SEC63 homolog, protein translocation regulator	UPR	178.48	61.7	-3.34621	-1.74253	5.35e-59	184.96	171.99	61.25	62.15	6.48526	0.450133	Xbp1 bound
Edem3	ER degradation enhancing alpha-mannosidase like protein 3	UPR	142.5	49.31	-3.34299	-1.74114	1.57e-80	146.42	138.58	46.74	51.89	3.9212	2.57393	Xbp1 bound
Ppib	peptidylprolyl isomerase B	UPR	914.05	316.47	-3.33812	-1.73904	1.9e-69	936.14	891.96	335.55	297.39	22.0883	19.0808	Xbp1 bound
Ssr1	signal sequence receptor subunit 1	UPR	245.6	85.34	-3.32727	-1.73434	8.98e-86	250.6	240.6	88.46	82.21	5.00211	3.12835	Xbp1 bound
Tspyl2	TSPY like 2	UPR	34.94	12.17	-3.31725	-1.72999	4.4e-32	31.99	37.89	11.45	12.88	2.95048	0.716049	Xbp1 bound
Dnajc10	DnaJ heat shock protein family (Hsp40) member C10	UPR	224.46	78.33	-3.31417	-1.72865	1.56e-72	234.84	214.09	81.87	74.79	10.3739	3.53948	Xbp1 bound
Gfpt1	glutamine--fructose-6-phosphate transaminase 1	UPR	156.45	55.1	-3.28604	-1.71635	8.03e-70	162.76	150.15	52.01	58.19	6.30983	3.09044	Xbp1 bound
Sil1	SIL1 nucleotide exchange factor	UPR	225.69	81.45	-3.19909	-1.67766	9.5e-56	224.28	227.1	86.69	76.2	1.4108	5.24208	Xbp1 bound
Srpr	SRP receptor subunit alpha	UPR	352.72	130.58	-3.12323	-1.64304	4.54e-74	360.75	344.68	130.25	130.92	8.03469	0.332869	Xbp1 bound
Yif1a	Yip1 interacting factor homolog A, membrane trafficking protein	UPR	103.88	39.72	-3.02197	-1.59549	2.37e-36	103.93	103.83	39.26	40.19	0.0530354	0.466223	Xbp1 bound
Tmed9	transmembrane p24 trafficking protein 9	Vesicular protein trafficing	915.95	299.83	-3.53206	-1.82051	1.28e-76	939.62	892.27	308.93	290.73	23.6773	9.09651	Xbp1 bound
Ergic3	ERGIC and golgi 3	Vesicular protein trafficing	517.32	173.45	-3.44866	-1.78604	3.72e-56	535.67	498.97	180.33	166.56	18.3505	6.88691	Xbp1 bound
Tmed2	transmembrane p24 trafficking protein 2	Vesicular protein trafficing	136.5	45.8	-3.4473	-1.78547	4.26e-62	141.79	131.22	44.79	46.82	5.28626	1.01382	Xbp1 bound

## Sheet: Xbp1-repressed genes
Supplementary Table 1: Xbp1-repressed genes determined by RNA-seq of Cd23-Cre Xbp1(fl/fl) [Xbp1(∆/∆)] versus control Xbp1(fl/fl) plasmablasts
Gene	Gene description	Functional annotation	Mean TPM	Mean TPM	Fold repressed	Log2-fold repr..	Adjusted P value	TPM 58378	TPM 58379	TPM 58380	TPM 58381	SEM (TPM)	SEM (TPM	Xbp1 binding
			Xbp1(fl/fl)	Xbp1(∆/∆)	(∆/∆) / (fl/fl)	(∆/∆) / (fl/fl)		Xbp1(fl/fl)	Xbp1(fl/fl)	Xbp1(∆/∆)	Xbp1(∆/∆)	Xbp1(fl/fl)	Xbp1(∆/∆)	Xbp1(Bio/Bio)
Lcn2	lipocalin 2	ER stress	2.77	12.98	4.05974	2.02139	4.98e-05	3.16	2.39	12.85	13.12	0.383526	0.132874	no Xbp1 binding
Cox6a2	cytochrome c oxidase subunit 6A2	Metabolism	4.14	218.15	45.6476	5.51247	6.59e-87	4.09	4.19	190.39	245.91	0.0497506	27.7584	no Xbp1 binding
Hyi	hydroxypyruvate isomerase (putative)	Metabolism	1.84	10.47	4.90321	2.29373	0.000114	1.74	1.94	7.14	13.79	0.0988761	3.32604	no Xbp1 binding
Rimkla	ribosomal modification protein rimK like family member A	Metabolism	0.95	5.18	4.73758	2.24415	0.0258	0.83	1.06	2	8.35	0.117102	3.17359	no Xbp1 binding
Inpp4b	inositol polyphosphate-4-phosphatase type II B	Metabolism	1.86	7.36	3.42417	1.77575	2.01e-09	1.83	1.89	6.79	7.93	0.0310027	0.570532	Xbp1 bound
S100a8	S100 calcium binding protein A8	Other	2.08	44.64	18.4731	4.20735	7.06e-13	1.72	2.45	45.68	43.6	0.365233	1.04313	no Xbp1 binding
Camp	cathelicidin antimicrobial peptide	Other	0.33	6.11	16.5199	4.04614	0.00248	0.45	0.2	6.89	5.34	0.12472	0.774254	no Xbp1 binding
S100a9	S100 calcium binding protein A9	Other	2.69	41.26	13.3544	3.73925	7.62e-15	3.08	2.29	39.35	43.17	0.397493	1.91002	no Xbp1 binding
Angptl6	angiopoietin like 6	Other	2.04	8.77	3.7389	1.90261	3.78e-05	2.15	1.92	9.99	7.55	0.117632	1.22301	Xbp1 bound
Itk	IL2 inducible T cell kinase	Other	1.32	5.24	3.44811	1.7858	1.58e-07	1.1	1.54	6.04	4.45	0.222674	0.796411	no Xbp1 binding
Vegfa	vascular endothelial growth factor A	Other	89.2	349.15	3.38815	1.7605	1.04e-62	86.63	91.77	312.45	385.86	2.56954	36.7076	Xbp1 bound
Ltf	lactotransferrin	Other	2.24	8.58	3.31996	1.73117	4.59e-07	2.11	2.36	8.55	8.61	0.125251	0.0297969	Xbp1 bound
Dsp	desmoplakin	Other	2.06	7.37	3.09179	1.62844	2.48e-14	1.91	2.21	6.06	8.68	0.152076	1.30653	no Xbp1 binding
Arhgap32	Rho GTPase activating protein 32	Signaling	2.65	15.94	5.1892	2.37551	3.39e-06	2.93	2.36	10.23	21.65	0.286052	5.71091	no Xbp1 binding
Trib3	tribbles pseudokinase 3	Signaling	12.2	55.76	3.95998	1.98549	3.49e-35	11.82	12.58	58.53	52.99	0.377856	2.76678	no Xbp1 binding
Ern1	endoplasmic reticulum to nucleus signaling 1	Signaling	51.39	188.33	3.17127	1.66506	2.65e-47	50.54	52.23	168.04	208.61	0.844478	20.2841	Xbp1 bound
Epcam	epithelial cell adhesion molecule	Surface receptor	2.26	28.53	10.9078	3.44729	1.83e-33	1.96	2.56	29.44	27.62	0.300375	0.908263	Xbp1 bound
Icosl	inducible T cell costimulator ligand	Surface receptor	1.71	8.49	4.29612	2.10303	4.32e-10	1.76	1.66	7.86	9.13	0.0527468	0.633906	Xbp1 bound
Cd2	CD2 molecule	Surface receptor	6.72	25.87	3.33352	1.73704	1.26e-09	5.89	7.55	27.23	24.5	0.831996	1.36201	Xbp1 bound
Atf5	activating transcription factor 5	Transcription regulator	99.83	541.58	4.69571	2.23134	3.24e-98	99.55	100.11	546	537.16	0.279984	4.42064	Xbp1 bound
Gm129	circadian associated repressor of transcription	Transcription regulator	3.62	13.29	3.1748	1.66667	8.41e-05	3.38	3.87	12.84	13.75	0.245392	0.456053	Xbp1 bound
Soat2	sterol O-acyltransferase 2	Transporter	0.68	8.08	10.2583	3.35872	4.82e-12	0.57	0.79	8.53	7.63	0.109931	0.445805	no Xbp1 binding
Atp1b1	ATPase Na+/K+ transporting subunit beta 1	Transporter	1.29	11.23	7.52826	2.91232	7.88e-20	1.09	1.48	11.1	11.35	0.195111	0.12046	no Xbp1 binding
Slc7a3	solute carrier family 7 member 3	Transporter	14.09	115.7	7.10559	2.82895	1.47e-64	14.77	13.41	109.22	122.18	0.680476	6.47674	no Xbp1 binding
Slc6a9	solute carrier family 6 member 9	Transporter	7.89	30.86	3.38396	1.75871	2.26e-25	8.23	7.55	28.66	33.07	0.339816	2.20422	Xbp1 bound
Ngp	neutrophilic granule protein	unknown	0.83	19.84	20.861	4.38273	3.93e-17	1.04	0.62	20.94	18.74	0.212057	1.09784	no Xbp1 binding
B230217O12Rik	RIKEN cDNA B230217O12 gene	unknown	3	16.72	4.83212	2.27266	4.42e-15	3.24	2.76	16.77	16.67	0.23841	0.0499078	Xbp1 bound
BC002163	NADH dehydrogenase Fe-S protein 5 pseudogene	unknown	3.54	15.39	3.75	1.90689	0.0165	3.23	3.84	5.21	25.57	0.303294	10.1823	no Xbp1 binding
Krt222	keratin 222	unknown	4.1	15.35	3.23554	1.69401	3.32e-12	4.04	4.17	13.61	17.08	0.0645022	1.73577	Xbp1 bound
